# Supplementary material for: Postglacial fire history and interactions with vegetation and climate in southwestern Yunnan Province of China
Source: Copernicus journal article supplement (doi:10.5194/cp-13-613-2017), 2017-06-07
Supplement: Supplementary file 1 [file Data availability.xlsx]

## Sheet: Sheet1
Age (cal. yr BP)	Charcoal concentration (particles cm-3)	CHAR (particles cm-2 a-1)	BCHAR (particles cm-2 a-1)	Fire episodes	peak Mag (particles cm-2 peak-1)	Fire Frequ (episodes kyr-1)		Age (cal. yr BP)	Palynological richness index	Simpson's reciprocal index	Tropical trees and shrubs	Lithocarpus/Castanopsis	Evergreen oaks	Alnus	Poaceae	Artemisia
-61	104.122	64.7422	64.7422	0	0	3.63192		-60	63.5019	9.89	7.25	11.59	6.52	30.98	8.51	5.62
-35	136.29	79.5027	58.767	1	359.692	3.52678		-55	68.1674	11.98	7.63	5.77	6.8	23.3	18.97	5.98
-9	83.3457	32.056	36.6627	0	0	3.42175		-51	62.3263	12.62	7.33	6.52	11.2	20.16	13.24	5.91
17	18.7741	2.16624	27.1653	0	0	3.31683		-46	60.5489	11.78	10.51	0.98	8.07	26.89	16.14	6.11
43	39.1058	4.84644	22.1858	0	0	3.21199		-42	70.3617	14.62	10.04	6.99	8.73	22.05	11.35	6.11
69	38.8236	4.70778	18.4394	0	0	3.10722		-37	66.8953	14.43	8.84	6.88	8.64	22.79	11.2	8.06
95	25.4244	2.13547	16.8357	0	0	3.00251		-32	61.4862	15.46	9.65	6.95	8.69	19.5	12.36	7.34
121	40.8525	4.91016	15.9954	0	0	2.89784		-28	57.9038	12.86	7.99	10.05	7.08	23.52	14.16	6.16
147	36.4166	4.60535	14.6459	0	0	2.79322		-22	63.1466	14.19	8.41	3.98	7.74	17.92	17.7	6.19
173	16.1642	0.73936	13.4502	0	0	2.68865		-19	61.8952	14.74	8.65	5.27	10.76	20.25	14.77	6.54
199	26.505	2.42113	10.2215	0	0	2.58417		-14	71.155	14.71	9.14	7.2	9.53	19.84	14.98	9.14
225	43.6133	5.0323	6.27261	0	0	2.47979		-9	66.7037	12.49	8.53	7.42	6.49	23.19	15.21	5.75
251	93.1715	10.9994	4.88658	0	0	2.37557		-2	58.6262	10.77	6.85	4.07	3.21	21.2	22.06	6.64
277	108.479	13.2701	5.07368	1	33.6707	2.27156		4	56.0458	10.69	9.57	5.44	4.13	24.39	21.95	4.88
303	64.8623	7.79595	5.21956	0	0	2.16787		14	62.2204	12.35	10.67	6.32	4.35	17.79	19.76	7.31
329	37.1933	4.47035	5.05451	0	0	2.06459		28	61.3811	12.54	12.33	7.02	6.07	18.6	19.17	9.68
355	39.5114	4.58012	5.1106	0	0	1.96188		51	54.0343	9.72	8.87	6.6	4.34	26.42	21.13	4.91
381	37.1631	4.28805	5.19928	0	0	1.85999		76	56.5584	11.45	7.43	7.23	7.63	24.3	16.47	8.63
407	18.4408	2.2854	5.23796	0	0	1.75935		100	64.5548	11.32	10.31	4.39	5.04	25	17.98	10.09
433	28.1295	3.39597	5.67482	0	0	1.66051		125	56.6673	10.79	7.54	7.13	5.91	24.44	20.57	5.91
459	35.7923	4.47404	6.28152	0	0	1.56388		150	62.2153	11.14	7.3	8.85	7.74	25.44	15.49	8.85
485	47.6026	5.72147	7.31823	0	0	1.46692		174	56.4948	12.01	8.96	8.96	4.85	22.01	18.47	7.28
511	49.5822	5.72102	8.16522	0	0	1.37043		198	54.1856	9.77	4.24	5.35	9.96	23.06	23.62	7.56
537	66.0249	7.61825	11.0749	0	0	1.2758		222	53.5704	10.79	7.73	6.65	5.58	21.04	22.3	6.65
563	17.2064	1.57174	15.6441	0	0	1.18469		248	60.2238	9	7.2	6.53	4.36	23.45	26.13	5.86
589	26.6342	3.20123	20.2863	0	0	1.09874		273	59.7687	8.84	5.73	7.51	5.53	23.91	23.32	11.07
615	54.8707	6.59504	25.3338	0	0	1.01942		298	59.2391	9.51	7.4	5.23	5.42	24.37	22.2	7.76
641	44.4308	5.34024	31.5378	0	0	0.94792		323	63.4777	12.86	7.21	7.4	6.45	16.51	19.35	11.01
667	75.2114	9.03984	32.7255	0	0	0.88509		348	62.8546	12.22	4.87	7.91	5.48	20.69	17.65	12.58
693	107.454	13.9484	33.8813	0	0	0.83145		373	62.0173	11.45	4.67	8.32	4.46	18.66	22.52	11.36
719	205.751	24.7297	34.8337	0	0	0.78714		399	66.8838	10.55	6.69	4.72	4.92	17.72	27.17	10.04
745	226.414	27.0922	35.5034	0	0	0.75194		424	62.1685	10.39	6.4	7.4	3.8	14.2	29	7.8
771	591.402	68.5546	35.5038	0	0	0.72529		449	70.3594	11.65	6.12	10.13	3.25	17.02	24.67	7.07
797	756.889	94.6111	35.1091	0	0	0.7063		465	65.3177	10.77	5.37	7.33	4.83	15.74	26.83	9.3
823	741.374	92.6717	36.0823	0	0	0.69396		498	65.2936	10.12	6.02	11.84	5.63	15.73	25.24	7.38
849	828.646	100.482	35.9904	0	0	0.68721		523	65.1465	12.26	9.09	9.64	6.36	15.82	22	8.55
875	1255.48	122.164	35.7607	0	0	0.68496		549	62.8646	13.27	6.29	7.24	8.76	14.67	21.33	9.9
901	612.495	24.8519	36.2739	0	0	0.6862		574	58.6246	10.71	5.13	8.62	6.98	14.37	27.52	5.95
927	366.251	25.3558	35.8404	0	0	0.69019		597	58.4042	12.6	5.67	9.24	9.87	16.81	21.64	8.4
953	789.984	22.571	35.1235	0	0	0.69668		622	63.8957	10.54	7.3	9.45	6.47	19.4	22.55	8.13
979	645.6	18.4457	35.1181	0	0	0.7061		647	62.1463	12.81	6.95	8.84	10.11	16.21	21.68	8.42
1005	347.472	5.72756	34.0163	0	0	0.71896		672	67.5712	11.83	6.88	6.88	7.66	15.52	22.79	10.81
1031	54.0168	0.11872	30.4081	0	0	0.73556		697	60.5098	9.11	4.76	9.9	9.14	20.95	22.67	8.38
1057	702.218	20.0634	26.0267	0	0	0.75597		720	61.8532	8.39	6.08	8.16	8.68	26.04	23.09	9.72
1083	189.059	1.4543	21.6943	0	0	0.77997		745	59.0643	10.43	5.36	8.25	7.42	19.79	21.65	11.55
1109	246.66	2.23222	16.4057	0	0	0.80701		770	56.3032	9.89	6.72	6.72	7.39	24.03	15.97	15.13
1135	641.317	15.0898	10.8451	0	0	0.83619		796	62.3443	9.29	5.83	7.38	5.63	23.69	19.22	14.56
1161	147.996	0.8036	9.98051	0	0	0.86642		820	57.3315	10.91	6.89	6.67	10.22	22.44	15.78	12.89
1187	120.769	0.32788	8.64599	0	0	0.89695		844	64.1138	12.9	8.71	7.88	9.34	19.09	17.43	7.05
1213	1046.67	24.6274	8.65466	0	0	0.92724		868	62.1859	13.24	11.86	8.3	12.06	17.79	14.23	6.72
1239	523.333	6.15686	8.6149	0	0	0.95686		897	62.8826	12.87	11.09	8.42	12.32	17.45	16.43	6.16
1265	0	0	9.15542	0	0	0.98572		937	56.7568	14.89	12.78	8.45	12.58	14.02	14.64	3.92
1291	530.508	11.3643	10.2602	0	0	1.01428		1020	67.311	7.79	13.59	6.16	2.76	36.09	10.83	2.76
1317	506.394	10.3547	10.0666	0	0	1.04314		1090	68.9472	7.45	11.08	3.37	3.13	38.55	9.64	4.1
1343	0	0	10.9407	0	0	1.07292		1252	68.5097	6.67	8.99	3.64	4.07	39.83	9.42	5.57
1369	746.181	16.5119	11.3739	0	0	1.10424		1410	77.4762	11.63	11.63	4.65	4.19	27.44	12.09	7.21
1395	532.987	8.42445	10.5797	0	0	1.13775		1483	75.0629	7.75	11.73	3.29	4.73	35.8	12.35	6.17
1421	0	0	10.8086	0	0	1.17394		1588	74.2768	7.92	11.96	4.51	4.51	36.08	10.39	4.71
1447	818.483	22.7356	11.5869	1	110.431	1.21293		1692	73.9964	7.39	11.27	4.18	5.64	38.2	9.6	2.51
1473	636.853	17.6903	11.3504	0	0	1.2541		1785	69.4967	6.23	11.88	3.54	2.71	41.46	11.46	4.17
1499	568.19	15.9973	11.9386	0	0	1.29611		1883	64.624	7.09	12.63	3.87	5.09	37.27	12.42	5.09
1525	717.714	21.1092	13.0773	0	0	1.33736		1994	66.6872	8.14	11.05	3.93	5.06	34.64	12.36	7.49
1551	572.186	16.3851	13.6561	0	0	1.37634		2225	60.9461	8.91	12.93	5.66	5.86	32.53	10.3	4.24
1577	626.932	18.0621	14.6197	0	0	1.41185		2336	70.3057	7.58	11.89	5.74	6.15	37.3	10.04	2.25
1603	493.98	10.4633	15.7042	0	0	1.44303		2450	65.2838	6.93	8.45	3.82	5.43	37.83	12.47	4.83
1629	0	0	15.3126	0	0	1.46947		2569	67.4219	5.67	8.7	5.14	5.53	42.89	7.91	3.56
1655	195.395	5.15329	14.8692	0	0	1.49113		2679	64.9451	5.62	8.4	4.69	5.47	43.16	8.59	5.27
1681	492.369	15.1149	15.8041	0	0	1.5081		2788	74.3113	6.93	9.26	4.91	5.1	38	10.21	4.54
1707	624.126	20.1331	15.7824	0	0	1.52058		2874	69.3529	5.52	10.04	4.82	5.02	43.57	10.24	3.61
1733	537.342	17.3336	15.6132	0	0	1.52876		2949	66.1723	6.06	9.6	5	4.2	41.8	9.6	6.4
1759	670.686	21.635	15.6595	0	0	1.53281		2997	63.9907	5.18	8.73	5.95	3.97	45.63	6.75	3.57
1785	693.187	22.3609	15.5041	0	0	1.53281		3046	70.2476	5.57	9.59	5.83	3.95	43.05	10.71	5.83
1811	888.557	28.6631	15.6713	0	0	1.52876		3095	64.9582	5.12	9.2	5.09	4.11	45.6	9	4.5
1837	704.06	20.6056	16.0095	0	0	1.52058		3146	63.9831	5.96	9.79	5.27	4.9	42.75	10.17	5.46
1863	430.52	9.07313	16.8108	0	0	1.5081		3198	59.6843	5.7	8.07	5.71	3.74	42.13	12.99	6.69
1889	0	0	18.1623	0	0	1.49113		3250	61.9147	6.39	8.68	5.85	5.28	39.81	12.45	5.47
1915	813.683	17.7623	18.6826	0	0	1.46947		3301	68.1749	7.08	10.75	6.27	6.45	37.81	9.14	4.3
1941	825.948	22.3229	18.6273	0	0	1.44303		3352	65.2273	8.36	13.38	7.06	4.83	33.64	12.08	4.65
1967	535.599	14.4756	18.3115	0	0	1.412		3401	64.7403	6.86	11.52	4.85	4.65	38.79	13.54	5.05
1993	624.446	16.8769	18.664	0	0	1.37753		3450	67.6447	6.32	9.73	5.71	4.02	41.01	12.05	5.5
2019	681.458	18.1568	18.7174	0	0	1.34152		3500	65.9709	7.98	12.94	6.08	4.71	35.69	10.78	6.08
2045	744.803	19.5614	18.6746	0	0	1.30623		3548	68.5802	8.27	11.85	3.95	5.2	35.34	12.47	6.65
2071	955.083	24.4893	18.2353	0	0	1.27405		3597	66.5829	10.22	12.58	6.71	5.66	31.03	11.74	5.03
2097	1001.8	25.6872	17.9646	0	0	1.24732		3648	63.6011	8.68	11.95	7.71	7.71	32.76	10.21	5.01
2123	1001.48	25.6789	18.1504	1	39.1021	1.2284		3665	73.5555	10.67	13.68	6.11	7.16	29.47	11.58	4.21
2149	586.494	15.0383	18.6367	0	0	1.21899		3776	77.7015	12.04	14.7	7.16	5.03	27.85	10.64	5.22
2175	548.483	14.0637	18.2738	0	0	1.2198		3851	78.4531	9.48	13.44	8.96	5.91	31.57	9.57	4.68
2201	548.958	14.1344	17.8227	0	0	1.23076		3928	73.5453	13.29	13.74	9.51	9.09	23.26	12.26	4.65
2227	889.159	24.0313	17.9774	0	0	1.25131		4008	69.4356	18.15	13.55	9.35	8.88	12.62	13.55	9.58
2253	838.016	22.6491	18.3053	0	0	1.28049		4087	70.0055	12.85	14.95	6.15	6.15	23.3	14.73	7.69
2279	797.269	21.5478	18.4309	0	0	1.31705		4164	70.3634	16.76	16.17	13.39	11.55	12.47	12.01	8.55
2305	751.697	20.3161	18.2094	0	0	1.35958		4242	71.2179	15.44	13.59	15.67	8.06	17.28	7.37	9.91
2331	584.541	15.4626	18.0648	0	0	1.4065		4320	71.8526	16.75	19.32	18.6	11.84	11.35	6.28	4.59
2357	474.499	12.6036	17.2921	0	0	1.45632		4398	80.6504	16.78	22.3	19.85	8.82	12.75	8.33	0.98
2383	341.817	9.23829	15.9406	0	0	1.50817		4477	84.1195	15.3	18.72	21.92	9.85	12.81	4.43	1.97
2409	422.067	10.8672	16.0416	0	0	1.56174		4557	61.6635	10.55	16.29	27.9	13.62	13.39	5.13	2.46
2435	542.087	13.7526	15.4442	0	0	1.61723		4635	77.5787	15.2	17.41	15.53	12	17.65	7.06	2.12
2461	696.63	17.4157	14.7635	0	0	1.67542		4712	70.9942	10.55	15.8	21.22	13.09	19.86	4.97	1.81
2487	903.768	23.1067	14.686	0	0	1.73693		4787	76.2002	13.06	14.98	20.97	14.52	14.06	7.14	2.76
2513	808.98	20.5436	14.4533	0	0	1.80218		4863	78.0793	11.71	19.09	19.55	20	13.64	4.77	0.68
2539	614.092	15.3523	14.5905	0	0	1.87176		4943	72.1055	11.46	17.66	22.25	17.2	13.99	7.57	0.69
2565	823.195	21.7408	15.1159	0	0	1.94644		5022	69.1847	12.74	13.88	18.82	16.71	15.53	8.47	3.06
2591	596.225	11.0072	15.5324	0	0	2.02723		5102	64.9386	9.98	17.93	25.06	19.54	9.43	7.36	0.46
2617	0	0	16.3621	0	0	2.1149		5182	69.9897	9.41	14.81	26.21	20.87	9.71	6.31	0.24
2643	626.025	16.9563	17.2417	0	0	2.20966		5261	69.5764	9.92	16.78	25.06	20.33	13.48	5.91	0.24
2669	250.41	2.713	18.1271	0	0	2.31121		5335	65.0544	8.29	14.16	27.67	21.13	11.33	5.88	1.31
2695	187.42	1.20141	19.7107	0	0	2.41879		5411	69.3443	9.16	16.71	25.65	23.29	10.35	0.71	0.94
2721	812.154	22.5598	20.1075	0	0	2.53131		5490	67.6863	10.33	16.32	22.84	19.81	10.96	7.93	0.93
2747	671.553	18.2277	21.9652	0	0	2.64754		5570	67.669	10.44	15.27	24.94	16.79	14.76	5.85	1.02
2773	786.745	24.155	23.2873	0	0	2.76625		5651	63.3013	9.43	17.15	25.12	20.05	11.84	5.07	0.48
2799	858.588	30.2978	24.7884	0	0	2.88647		5733	69.0223	11.01	19.53	24.47	16.71	10.82	6.12	0
2825	677.909	23.3762	26.6548	0	0	3.00759		5760	69.1865	13.21	11.49	13.45	11.98	18.09	15.16	5.13
2851	822.672	28.368	27.9587	0	0	3.12941		5842	71.7253	10.82	19.95	25.06	16.94	12.06	6.5	0.23
2877	752.603	25.9518	30.1551	0	0	3.25201		5923	67.5007	8.24	15.67	30.41	18.66	8.53	5.3	0
2903	802.958	27.6882	31.1798	0	0	3.37557		6002	75.772	10.08	17.87	28.29	14.89	11.17	5.21	0
2929	770.992	43.8412	32.6446	1	111.676	3.50012		6082	77.7798	10.94	17.38	24.43	18.14	10.58	5.54	1.26
2955	399.277	24.9548	34.3009	0	0	3.6251		6163	74.3439	8.07	16.87	34.23	13.69	9.78	5.38	0.24
2981	934.451	58.4032	35.3665	0	0	3.74934		6241	69.9004	9.12	13.71	26.71	20.57	10.4	5.44	0.71
3007	737.297	45.6641	36.1	0	0	3.87153		6321	63.5027	9.1	13.45	27.38	20.54	11.74	5.13	0.73
3033	745.847	43.8734	36.5835	0	0	3.99063		6402	68.5551	10.46	16.5	24.14	21.43	9.11	5.91	0.74
3059	923.597	57.2024	37.0953	1	939.376	4.10563		6484	70.6003	7.85	13.8	29.54	23.24	8.47	4.36	0
3085	594.002	35.7812	38.2787	0	0	4.2149		6568	70.7071	9.48	19.48	26.84	20.67	7.6	4.51	0.95
3111	709.424	41.7308	38.5873	0	0	4.31644		6646	70.8603	8.8	15.48	27.62	23.33	6.67	5.24	0.24
3137	642.592	36.4265	37.7806	0	0	4.40852		6724	67.2136	8.5	16.5	29.06	21.43	5.91	6.4	0.25
3163	520.356	30.5438	37.8807	0	0	4.48957		6804	68.0302	8.92	14.32	27.18	22.82	7.52	5.83	0.73
3189	555.424	32.672	38.5164	0	0	4.55843		6882	73.0857	10.74	15.28	21.3	21.3	10.65	4.86	1.39
3215	741.96	42.8054	39.3297	0	0	4.61492		6958	65.6224	9.5	15.22	29.23	15.22	12.32	5.8	0.24
3241	557.498	32.1634	38.8702	0	0	4.65969		7035	65.0148	10.52	17.97	26.84	19.75	6.33	5.57	0.76
3267	566.819	33.3423	37.0145	0	0	4.69403		7111	74.8117	10.88	15.1	24.01	22.03	5.45	6.93	0.99
3293	680.371	40.0218	37.2743	0	0	4.72003		7187	77.1913	9.8	16.59	24.52	23.32	6.73	6.25	0.72
3319	779.651	45.8618	35.197	1	97.8478	4.74001		7266	65.3781	8.35	14.11	25.84	25.84	8.61	4.31	0.48
3345	644.227	34.2298	34.9708	0	0	4.75578		7347	70.6961	10.98	16.67	25	19.12	7.35	6.62	0.98
3371	368.346	10.6254	34.4375	0	0	4.76852		7424	75.9264	9.79	15.2	26.47	17.89	8.33	6.62	0.98
3397	479.966	29.5907	34.749	0	0	4.77913		7503	78	11.87	14.01	23.35	20.05	5.49	10.99	0.27
3423	917.543	55.9193	34.1368	0	0	4.78848		7584	67.1958	8.91	12.71	26.16	24.94	6.85	6.36	1.22
3449	672.376	40.4072	32.4172	0	0	4.79741		7662	75.1882	8.78	9.45	25.58	25.35	7.37	7.14	1.15
3475	826.537	49.6717	30.1935	1	799.304	4.80672		7738	75.6997	10.18	14.69	25	23.97	5.41	6.19	0.52
3501	166.511	10.4069	29.4719	0	0	4.81666		7813	73.5563	8.91	13.57	27.86	23.1	7.38	6.19	0.95
3527	780.95	48.8094	28.8412	1	339.737	4.82653		7891	70.7769	9.48	11	24.5	24.5	7.75	7.25	0.75
3553	283.754	17.7346	27.1815	0	0	4.8347		7973	65.8224	9.33	12.56	26.38	22.36	8.29	7.04	0
3579	533.918	31.4824	25.8086	0	0	4.83894		8058	66.6513	11.81	11.69	25.97	17.66	10.65	9.87	0.78
3605	537.169	31.5982	24.3656	0	0	4.83719		8143	75.4236	9.94	11.29	19.29	26.59	7.53	10.12	0.47
3631	719.847	42.3439	24.014	0	0	4.82797		8231	67.7495	13.2	12.81	19.21	18.47	12.07	8.62	1.48
3657	391.751	18.9126	23.6339	0	0	4.81053		8318	73.3301	13.2	13.44	22.74	11.63	13.18	11.37	4.65
3683	0	0	21.975	0	0	4.78483		8404	70.1364	12.17	11.31	20.6	20.85	9.55	10.8	1.76
3709	69.2506	0.55489	20.9452	0	0	4.75134		8488	74.2849	14.19	7.76	19.06	15.29	12.94	8.24	7.29
3735	432.297	18.4533	19.958	0	0	4.71086		8571	69.851	13.97	8.63	17.27	11.75	16.31	10.07	6.24
3761	478.694	21.3586	20.9873	0	0	4.66432		8655	74.8581	14.01	10.41	17.77	13.96	12.69	12.18	1.78
3787	208.144	8.48747	19.6172	0	0	4.61251		8740	72.4624	15.33	12.53	17.9	13.55	12.79	8.44	4.35
3813	508.837	19.7773	20.301	0	0	4.55591		8826	76.1621	15.51	12.31	18.09	14.32	12.56	7.79	5.03
3839	376.388	6.81246	20.1079	0	0	4.49466		8907	79.6843	15.06	12.78	16.79	16.79	10.53	9.52	1.75
3865	177.768	3.94455	19.6821	0	0	4.42876		8989	72.9898	13.38	8.73	17.46	15.46	13.97	12.97	3.24
3891	581.616	22.3698	19.416	0	0	4.35814		9075	72.9892	14.19	9.09	15.58	14.81	14.81	8.57	5.45
3917	648.231	24.3992	20.1573	0	0	4.28294		9162	71.5717	13.93	14.76	17.38	15.24	15.24	8.33	3.1
3943	562.74	20.8422	21.2308	0	0	4.20352		9248	79.8645	17.37	18.47	13.98	11.87	16.89	6.6	3.69
3969	818.927	30.9139	22.9997	1	26.3336	4.11993		9332	75.7921	15.95	15.14	15.88	14.64	11.66	10.17	2.23
3995	793.767	29.9642	23.712	0	0	4.03145		9416	68.6984	13.41	15.73	16.57	17.7	14.61	8.15	1.69
4021	604.249	22.7768	23.4567	0	0	3.93704		9499	71.9348	12.6	11.94	18.5	18.27	15.22	9.37	2.81
4047	798.888	30.7265	24.0835	0	0	3.83619		9581	77.2401	14.03	15.97	18.98	19.21	9.26	7.41	2.55
4073	710.057	27.8141	23.8541	0	0	3.72958		9663	76.0946	13.4	12.35	15.8	17.78	17.04	10.86	1.98
4099	599.204	23.5072	23.8279	0	0	3.61882		9738	77.079	14.16	11.62	14.77	16.95	15.01	8.23	4.36
4125	969.534	37.2898	23.944	0	0	3.50607		9809	77.947	14.9	13.55	17.98	15.02	13.05	9.11	1.97
4151	857.903	32.9963	23.0916	1	255.086	3.39368		9879	73.2976	15.83	13.84	18.54	14.36	10.97	10.18	2.87
4177	530.304	20.3963	22.0383	0	0	3.28357		9949	76.1655	17.89	17.16	15.93	10.54	15.93	7.11	2.94
4203	888.279	34.1646	21.0652	0	0	3.17691		10021	79.1272	14.08	14.91	8.23	17.99	20.82	8.48	2.57
4229	831.664	31.9871	19.6	1	315.457	3.07411		10091	70.2424	13.56	13.27	8.16	16.07	21.43	8.67	4.59
4255	429.196	16.5075	18.1851	0	0	2.97464		10160	73.6071	13.21	12.26	8.41	17.79	19.95	8.41	4.57
4281	530.325	20.3971	17.136	0	0	2.87724		10231	72.7671	13.25	10.54	6.37	16.18	24.26	8.58	4.17
4307	400.863	15.4178	15.7	0	0	2.78057		10302	70.2685	11.6	8.39	9.11	17.03	26.14	9.35	2.88
4333	164.171	6.31426	14.3701	0	0	2.68366		10368	72.6054	12.06	9.11	5.14	17.76	24.77	10.28	3.97
4359	159.94	6.15155	13.2796	0	0	2.58556		10436	58.5319	16.24	10.02	7.35	21.38	8.69	10.91	2.9
4385	160.538	6.17454	11.4724	0	0	2.48519		10504	56.6576	12.71	6.65	10.19	24.95	11.02	13.72	3.53
4411	111.796	4.38586	9.80875	0	0	2.38135		10575	54.1943	12.96	5.86	5.86	24.06	15.48	9.62	2.72
4437	62.4626	2.35436	8.87956	0	0	2.27291		10645	56.285	12.53	7.45	5.53	24.89	12.77	8.51	5.74
4463	84.6515	3.07495	7.31654	0	0	2.15905		10718	59.5937	10.19	7.92	6.46	28.13	16.67	10.63	4.38
4489	83.1676	3.08028	5.87318	0	0	2.03964		10797	60.545	11.71	9.14	0.26	21.67	16.45	9.66	4.7
4515	75.6766	2.8443	5.32093	0	0	1.91523		10880	64.6834	9.67	5.78	5.14	29.76	16.49	7.28	4.71
4541	90.7678	3.44134	4.48786	0	0	1.78707		10964	56.6366	12.17	5.24	7.18	25.05	14.76	7.38	6.8
4567	66.9312	2.54758	3.74109	0	0	1.65657		11047	65.901	8.62	5.79	4.94	29.18	22.32	7.51	4.08
4593	70.7307	2.78737	3.60754	0	0	1.52516		11130	60.9554	9.24	4.99	4.61	29.94	15.74	11.32	4.61
4619	76.7605	2.95233	3.43495	0	0	1.39416		11213	52.9089	7.79	4.56	3.6	35.01	4.56	11.03	5.52
4645	35.5204	1.38719	3.32287	0	0	1.26473		11294	57.4517	9.93	6.57	8.9	27.12	14.62	7.42	3.81
4671	69.6732	2.74158	3.4732	0	0	1.1379		11378	55.1749	6.4	2.17	2.96	35.77	18.38	9.09	3.36
4697	114.215	4.46722	3.61279	0	0	1.01464		11460	52.8308	5.68	4.46	3.1	41.09	11.43	6.2	1.74
4723	114.08	4.56319	3.61618	0	0	0.89586		11541	61.4636	8.77	3.08	2.12	33.53	9.63	11.56	4.43
4749	150.371	6.01484	3.81412	0	0	0.78236		11627	54.7142	8.81	2.73	2.34	33.53	10.33	10.92	3.51
4775	114.22	4.56879	4.08479	0	0	0.67511		11713	53.9228	8.94	2.99	4.19	33.13	4.59	10.18	3.79
4801	30.7283	1.22913	4.13481	0	0	0.57559		11794	51.743	8.13	4.55	2.47	38.33	6.07	10.63	3.8
4827	96.7084	3.77678	4.1854	0	0	0.48568		11876	62.8219	10.39	4.36	3.23	32.26	6.83	10.44	6.07
4853	76.4234	2.87237	4.28959	0	0	0.40764		11960	54.7262	8.97	2.24	2.85	33.4	8.15	13.03	6.31
4879	106.847	4.04512	4.26475	0	0	0.34367		12041	52.5549	7.87	3.57	3.37	38.1	7.54	9.72	3.77
4905	192.408	7.24217	4.30488	0	0	0.29553		12117	55.5778	9.76	3.47	2.24	30.41	5.92	13.67	6.33
4931	132.434	5.00653	4.29931	0	0	0.26439		12175	54.531	7.43	3.33	6.65	37.92	0	13.3	6.87
4957	81.6215	3.13929	4.19059	0	0	0.25097		12233	55.3517	7.86	4.54	3.71	38.14	4.54	11.75	4.95
4983	181.489	6.84115	4.14622	0	0	0.25573		12290	65.5336	8.59	2.72	2.3	34.94	6.28	10.46	3.56
5009	215.652	7.9871	4.02273	0	0	0.27838		12348	60.6677	8.51	3.4	3.62	37.23	5.96	10.85	6.17
5035	118.577	4.39174	3.8969	0	0	0.31776		12406	64.7989	7.09	4.08	4.08	38.83	7.77	10.1	3.11
5061	93.2185	3.50872	3.99008	0	0	0.37197		12463	55.0768	7.15	4.71	5.49	39.22	7.06	10.78	1.96
5087	125.913	4.76691	3.93737	0	0	0.43847		12521	54.9059	7.3	3.62	4.35	38.41	7.25	7.79	4.71
5113	65.9975	2.48051	3.88512	0	0	0.5144		12580	56.9706	5.75	4.32	2.95	43.42	9.43	9.04	2.55
5139	56.6975	2.14961	3.81265	0	0	0.59697		12639	50.9004	6.79	2.73	5.08	39.65	6.25	8.01	5.47
5165	71.1639	2.6357	3.57145	0	0	0.68392		12699	54.6634	5.23	3.33	2.35	45.69	1.76	8.24	4.9
5191	64.8416	2.40154	3.43417	0	0	0.77331		12758	61.4087	5.5	3.94	2.76	43.7	1.97	10.63	5.31
5217	98.3253	3.72011	3.39786	0	0	0.86373		12816	58.1021	5.35	4.1	0	45.13	2.05	10.77	4.79
5243	91.7168	3.66867	3.19703	0	0	0.95454		12875	58.3335	6.36	3.58	4.52	38.42	1.88	15.44	4.71
5269	54.4466	2.17786	2.96066	0	0	1.04546		12934	62.7476	7.46	3.18	5.42	36.45	2.24	13.83	2.99
5295	73.8083	2.99964	2.90727	0	0	1.13627		12992	62.1807	8.77	4.9	6.46	35.41	3.34	12.92	5.35
5321	67.8615	2.77536	2.84144	0	0	1.22669		13050	58.7478	5.34	4.26	0	48.09	4.68	5.53	3.19
5347	46.987	1.87948	2.6705	0	0	1.31623		13108	60.7134	7.44	3.61	3.01	37.35	3.61	12.25	5.02
5373	68.1165	2.66823	2.66768	0	0	1.40422		13166	66.2512	8.12	5.58	3.9	35.32	3.9	15.06	4.83
5399	70.5494	2.65932	2.66867	0	0	1.48977		13226	51.6257	7.58	4.81	3.65	37.12	6.35	11.15	2.88
5425	63.5296	2.3982	2.62412	0	0	1.57181		13286	47.9833	7.58	4.55	4.35	37.55	6.32	10.87	5.73
5451	63.6847	2.44941	2.66033	0	0	1.64917		13345	60.6584	7.39	3.97	1.7	36.86	4.73	13.8	5.1
5477	80.1447	3.02541	2.87594	0	0	1.72063		13404	58.7251	7.15	2.3	4.18	38.62	3.34	15.03	5.64
5503	94.3953	3.49612	4.18705	0	0	1.78502		13460	61.9849	8.97	4.63	4.02	32.19	2.21	18.11	5.63
5529	89.7261	3.37727	4.07892	0	0	1.8413		13516	51.599	7.63	5.39	4.79	36.13	2.79	15.37	5.79
5555	59.6416	2.25796	5.01844	0	0	1.88869		13573	66.1826	8.6	3.21	3.61	30.52	3.61	19.08	5.22
5581	41.0176	1.51917	5.02389	0	0	1.92678		13631	58.8308	8.79	5.69	3.98	32.64	2.47	16.7	7.21
5607	65.5266	2.42691	5.28696	0	0	1.95565		13689	52.2373	6.8	2.8	1.68	39.55	3.73	12.87	5.78
5633	58.5463	2.16838	5.36803	0	0	1.97589		13748	55.9379	7.44	3.78	2.84	34.78	2.84	19.28	8.13
5659	48.3077	1.78917	5.43393	0	0	1.98868		13805	53.0947	8.32	2.66	3.69	33.61	3.69	14.14	8.4
5685	84.1137	3.08965	5.3126	0	0	1.99568		13862	51.3244	6.27	2.44	2.25	40.9	3.75	13.51	6.38
5711	217.625	7.81661	5.47551	0	0	1.99881		13919	54.181	9.34	2.95	2.21	29.83	3.5	16.39	9.94
5737	872.305	28.5798	5.63593	1	417.104	1.99985		13978	63.8802	9.88	3.85	1.82	28.14	4.05	19.23	7.69
5763	44.9087	0.12338	5.92761	0	0	2		14036	59.3161	8.27	5.06	1.62	33.81	4.66	15.79	9.11
5789	583.813	20.8505	5.76898	1	212.682	2		14092	56.8312	7.13	4.52	1.69	37.1	3.77	16.2	7.72
5815	77.7336	2.87902	5.77765	0	0	1.99985		14149	57.6245	7.6	1.98	1.59	36.11	3.77	14.29	9.92
5841	192.302	6.87772	5.95283	0	0	1.99881		14205	50.9711	7.24	2.16	2.88	32.07	5.41	21.08	7.39
5867	110.332	4.20855	6.00783	0	0	1.99584		14243	54.7003	9.14	1.55	6.36	29.38	11.68	17.01	7.39
5893	103.424	3.91146	6.04113	0	0	1.98987		14301	62.0516	10.41	3.16	4	27.79	12.42	12.63	8.21
5919	15.9993	0.09288	6.11088	0	0	1.98005		14359	68.1138	10.99	3.57	5.67	23.74	13.87	15.34	8.61
5945	176.931	5.54483	6.22558	0	0	1.96577		14419	64.3308	12.15	2.75	4.87	22.88	12.71	15.68	9.11
5971	159.041	6.07338	6.05766	0	0	1.94673		14478	55.3572	10.29	2.12	5.02	23.17	14.29	14.48	11.2
5997	238.623	9.03793	4.88028	0	0	1.92292		14535	61.2389	9.8	3.59	1.99	25.5	12.75	15.34	7.97
6023	50.0786	0.36342	4.9482	0	0	1.89457		14593	68.7649	11.99	4.44	4.44	20	13.54	15.35	10.3
6049	85.0336	2.42261	3.91413	0	0	1.8621		14651	64.6568	11.84	4.34	3.04	21.69	15.4	14.32	9.54
6075	130.887	4.84765	3.93118	0	0	1.82606		14708	58.7077	8.92	2.52	2.1	30.61	14.47	10.48	10.06
6101	93.7381	3.47178	3.6067	0	0	1.78707		14765	62.0375	10.13	2.57	2.57	28.27	14.02	12.62	7.94
6127	75.6324	2.8012	3.41268	0	0	1.74574		14821	55.612	10.74	2.12	1.42	24.29	13.44	12.03	13.21
6153	82.1422	3.11431	3.39887	0	0	1.7027		14891	57.4394	10.65	2.44	2.22	25.72	15.3	11.75	9.53
6179	136.996	5.26908	3.61254	0	0	1.65848		14969	48.6043	9.83	0.44	1.32	26.65	17.18	10.13	11.01
6205	120.277	4.62602	3.46643	0	0	1.61353		15069	51.4443	10.8	1.07	2.78	23.72	10.47	14.1	13.03
6231	163.345	6.20957	3.30499	0	0	1.56821		15169	56.1829	11.48	1.32	1.32	23.3	9.45	13.41	15.6
6257	88.5641	1.41394	2.91517	0	0	1.52274		15270	58.1169	10.5	1.27	1.48	26.85	9.09	10.36	16.07
6283	56.3012	1.20302	3.02528	0	0	1.47726		15369	46.9044	8.89	0.71	0.47	29.18	5.18	16	17.65
6309	86.4814	3.20302	2.99935	0	0	1.43179		15467	41.2771	8.57	0.41	2.04	29.24	11.86	8.38	17.38
6335	38.4804	0.7126	2.7444	0	0	1.38647		15565	48.2683	11.28	1.16	2.32	27.61	7.89	10.67	14.85
6361	30.5532	0.52228	2.69042	0	0	1.34152		15663	49.3554	11.43	0.74	0.98	22.36	8.6	12.29	18.67
6387	98.5258	3.6491	2.75244	0	0	1.2973		15760	45.5823	9.46	0.46	0.91	28.93	7.74	10.71	19.82
6413	113.682	4.1526	3.12319	0	0	1.25426		15858	51.726	9.11	2.08	1.39	31.87	7.39	8.55	16.63
6439	76.6478	2.76862	2.84621	0	0	1.21293		15955	49.511	9.51	1.65	2.13	25.53	7.57	8.04	21.99
6465	81.954	3.00615	2.85039	0	0	1.17394		16051	51.8947	9.36	0.66	2.42	29.67	4.84	8.57	19.34
6491	45.6748	1.63124	3.12898	0	0	1.1379		16152	51.5474	10.69	1.16	2.09	25.99	5.34	12.06	16.71
6517	68.4633	2.45557	3.58504	0	0	1.10543		16252	53.7186	10.04	1.11	0.89	28.51	8.24	11.36	17.15
6543	54.1913	1.92989	3.74501	0	0	1.07708		16351	57.8794	10.16	1.7	2.98	28.3	7.23	10.21	14.26
6569	2.39621	0.00354	3.72926	0	0	1.05327		16449	49.9887	9.09	1.28	1.28	26.87	6.82	11.73	19.62
6595	63.6046	2.44633	4.07057	0	0	1.03423		16547	47.3092	8.53	0.81	1.22	25.81	6.3	10.98	21.34
6621	103.468	3.97955	4.23257	0	0	1.01995		16646	47.3146	8.15	0.4	1.79	29.08	6.18	9.16	20.52
6647	274.685	10.1585	4.04077	0	0	1.01013		16744	53.8371	9.12	1.06	1.7	28.03	6.16	9.98	17.41
6673	4.42279	0.00654	3.99999	0	0	1.00416		16844	48.6705	8.83	1.07	1.71	28.91	7.28	11.13	18.84
6699	122.515	4.7054	4.05454	0	0	1.00119		16944	50.1058	8.03	1.02	1.84	31.08	4.7	9	18.81
6725	310.576	11.5028	3.89632	1	18.3332	1.00015		17043	64.444	9.67	2.4	7.21	29.26	1.97	11.14	15.94
6751	272.133	10.079	3.81139	0	0	0.99985		17142	62.8218	9.35	1.68	6.93	31.3	6.93	8.61	11.55
6777	110.463	4.24251	3.85364	0	0	0.99881		17240	51.2696	8.02	0.41	2.46	32.24	6.98	8.62	16.43
6803	78.2825	2.90364	4.11683	0	0	0.99584		17339	48.0254	8.36	0.84	1.05	30.75	7.53	11.09	18.83
6829	187.672	7.19757	4.55705	0	0	0.98987		17437	49.8898	8.23	1.2	1.6	31	5	10.4	16.2
6855	91.9439	3.60031	4.56529	0	0	0.98005		17538	47.3557	7.76	1.05	1.46	35.15	5.65	10.25	13.39
6881	3.19999	0.00483	4.66548	0	0	0.96577		17637	50.4186	7.49	0.99	0.2	31.56	5.33	9.27	16.57
6907	87.8235	3.37783	4.55875	0	0	0.94673		17735	49.269	8.36	0.37	1.49	30.97	7.65	7.65	15.67
6933	100.248	3.80496	4.65361	0	0	0.92292		17837	59.0275	9.36	1.95	0.87	27.71	7.36	9.31	19.7
6959	0	0	4.41662	0	0	0.89457		17938	61.3218	9.07	1.58	2.89	33.16	7.11	12.11	0
6985	5.97556	0.01768	3.96236	0	0	0.8621		18039	54.9677	8.03	1.64	3.48	32.72	9.61	12.27	12.27
7011	84.4546	3.25825	3.59655	0	0	0.82606		18137	55.0816	6.85	1.24	5.18	37.27	4.14	8.49	14.29
7037	174.035	6.9305	3.49151	0	0	0.78707		18235	61.6279	8.36	2.42	4.85	31.94	6.39	10.79	14.1
7063	216.562	8.36774	3.34057	0	0	0.74574		18301	54.0978	8.52	1.91	6.38	31.06	5.96	10.85	16.6
7089	65.0738	2.60295	3.08211	0	0	0.7027		18365	58.213	7.14	0.83	5.63	38.75	5.63	11.88	8.33
7115	148.172	5.88306	2.89478	0	0	0.65848		18425	61.1406	9.22	2.48	5.37	31.61	5.17	12.6	9.71
7141	209.785	8.13073	3.058	0	0	0.61353		18465	64.2876	9.47	1.86	12.01	31.26	4.76	8.9	8.28
7167	58.7856	1.80879	3.0597	0	0	0.56821
7193	20.3218	0.20264	3.10458	0	0	0.52274
7219	77.541	2.87189	3.33234	0	0	0.47726
7245	84.4704	3.12853	3.62197	0	0	0.43179
7271	71.6947	2.24684	3.45092	0	0	0.38647
7297	8.05128	0.03573	3.38491	0	0	0.34152
7323	64.4103	2.28675	3.13812	0	0	0.2973
7349	9.26695	0.04113	3.08513	0	0	0.25426
7375	80.7571	3.10604	2.77597	0	0	0.21293
7401	88.6639	3.41015	2.51586	0	0	0.17394
7427	121.101	4.65772	2.52804	0	0	0.1379
7453	112.993	4.32731	2.63694	0	0	0.10543
7479	161.478	5.52061	2.74787	0	0	0.07708
7505	5.89469	0.0084	2.74476	0	0	0.05327
7531	153.262	5.67637	2.90967	0	0	0.03423
7557	99.3237	3.67866	3.09607	0	0	0.01995
7583	41.5605	1.5962	2.98663	0	0	0.01013
7609	3.01923	0.00893	3.27348	0	0	0.00416
7635	86.2233	3.18873	3.36844	0	0	0.00119
7661	53.0437	2.04014	3.36762	0	0	0.000152682
7687	56.8789	2.27179	3.12279	0	0	0
7713	124.489	4.97955	3.11084	0	0	0
7739	76.4872	3.06929	2.99031	0	0	0
7765	130.306	5.3803	3.15625	0	0	0
7791	107.807	3.57731	2.99627	0	0	0
7817	28.0357	0.20736	2.90886	0	0	0
7843	143.795	5.4912	2.97236	0	0	0
7869	132.951	4.91035	3.12839	0	0	0
7895	105.525	3.39451	3.00151	0	0	0
7921	4.25789	0.00607	2.91746	0	0	0
7947	110.705	4.10019	3.00141	0	0	0
7973	87.2222	3.23045	2.95717	0	0	0
7999	91.4156	3.16124	2.84075	0	0	0
8025	76.4667	2.63678	2.55764	0	0	0
8051	57.0285	2.01782	2.54124	0	0	0
8077	80.2886	2.8028	2.68499	0	0	0
8103	85.4224	2.97342	2.51476	0	0	0
8129	41.1802	0.77803	2.41747	0	0	0
8155	37.1365	0.44327	2.36273	0	0	0
8181	113.008	3.86686	2.41036	0	0	0
8207	123.843	4.13904	2.29779	0	0	0
8233	24.8583	0.85718	2.18347	0	0	0
8259	0.95609	0.00127	2.01734	0	0	0
8285	111.922	3.26562	1.90082	0	0	0
8311	85.2199	2.93862	1.91266	0	0	0
8337	64.0436	2.25694	1.96725	0	0	0
8363	87.3502	3.06173	1.81195	0	0	0
8389	68.28	2.35448	1.89297	0	0	0
8415	25.8306	0.91101	1.95399	0	0	0
8441	53.4738	1.96147	1.8576	0	0	0
8467	36.692	1.05842	1.76827	0	0	0
8493	1.13933	0.0047	1.81017	0	0	0
8519	11.8236	0.42287	1.87724	0	0	0
8545	60.5571	2.24286	1.84315	0	0	0
8571	107.516	3.83988	1.82901	0	0	0
8597	8.2705	0.02272	1.71211	0	0	0
8623	76.6864	2.31745	1.70184	0	0	0
8649	44.8766	1.60274	1.82628	0	0	0
8675	56.9896	2.03534	1.91298	0	0	0
8701	69.8564	2.44193	1.80975	0	0	0
8727	47.9405	1.65312	1.93645	0	0	0
8753	36.4908	1.27559	2.02893	0	0	0
8779	73.7026	2.61803	2.10816	0	0	0
8805	94.2085	2.66988	2.08361	0	0	0
8831	8.41901	0.03598	1.99839	0	0	0
8857	77.1683	2.86654	2.08477	0	0	0
8883	123.206	4.71883	2.02218	0	0	0
8909	70.3538	2.55832	1.97798	0	0	0
8935	0	0	1.87271	0	0	0
8961	97.318	3.46574	1.84099	0	0	0
8987	49.192	1.76186	2.06693	0	0	0
9013	55.6114	1.92817	2.26845	0	0	0
9039	51.5188	1.77651	2.13697	0	0	0
9065	63.0121	2.22059	2.11126	0	0	0
9091	48.3267	1.664	2.30959	0	0	0
9117	33.4046	1.12825	2.34207	0	0	0
9143	30.2762	0.76293	2.21148	0	0	0
9169	6.39588	0.03514	2.21853	0	0	0
9195	51.6392	1.83937	2.40834	0	0	0
9221	172.432	5.94592	2.36947	0	0	0
9247	143.115	5.10445	2.32617	0	0	0.000152682
9273	21.8372	0.11998	2.23297	0	0	0.00119
9299	75.6193	2.18132	2.35387	0	0	0.00416
9325	106.519	3.80424	2.40825	0	0	0.01013
9351	97.5423	3.48365	2.61097	0	0	0.01995
9377	62.6546	2.23767	2.55236	0	0	0.03423
9403	75.3833	2.69226	3.03971	0	0	0.05327
9429	99.4211	3.60639	3.31597	0	0	0.07708
9455	75.1559	2.7272	3.5486	0	0	0.10543
9481	38.6653	0.93924	3.57808	0	0	0.1379
9507	22.8958	0.15725	3.48612	0	0	0.17409
9533	112.505	4.07365	3.67571	0	0	0.21413
9559	82.4999	3.25384	3.69197	0	0	0.25842
9585	171.462	5.51558	3.57168	0	0	0.30742
9611	10.408	0.01483	3.68901	0	0	0.36147
9637	270.609	10.0225	3.78327	0	0	0.4207
9663	147.952	5.28399	3.64762	0	0	0.48506
9689	146.209	6.25941	3.96638	0	0	0.55434
9715	156.144	6.50599	4.16372	0	0	0.62817
9741	79.9071	3.3573	4.68656	0	0	0.7061
9767	85.6099	3.72217	4.89622	0	0	0.78747
9793	93.0751	2.4903	4.70638	0	0	0.87141
9819	67.686	1.5186	5.03573	0	0	0.95696
9845	137.109	5.71289	4.92213	0	0	1.04304
9871	93.8629	4.02867	5.15513	0	0	1.12859
9897	13.7449	0.11492	5.38934	0	0	1.21253
9923	251.235	9.66289	5.12221	0	0	1.2939
9949	155.439	6.47663	4.79424	0	0	1.37183
9975	260.955	10.8731	5.16838	0	0	1.44566
10001	129.192	4.14076	4.99888	0	0	1.51494
10027	34.8889	0.46674	5.07707	0	0	1.5793
10053	218.767	9.51161	5.45085	0	0	1.63853
10079	167.291	3.35701	5.78874	0	0	1.69258
10105	156.25	4.4419	5.99179	0	0	1.74158
10131	340.24	14.4725	5.78678	0	0	1.78587
10157	42.7638	0.20849	5.9516	0	0	1.82591
10183	17.1869	0.02813	5.71377	0	0	1.8621
10209	378.113	13.6145	5.58602	1	29.305	1.89457
10235	14.2252	0.13678	5.74869	0	0	1.92277
10261	123.338	5.20782	6.17107	0	0	1.94554
10287	216.458	9.59222	6.59292	0	0	1.96161
10313	179.137	7.93836	6.63538	0	0	1.96993
10339	213.415	9.57091	6.46495	0	0	1.96993
10365	25.443	0.13344	6.48649	0	0	1.96161
10391	71.9061	3.2466	5.8829	0	0	1.94569
10417	118.316	5.14418	5.97658	0	0	1.92396
10443	91.5354	4.04938	6.04903	0	0	1.89873
10469	314.569	13.9639	5.80503	1	32.6934	1.87238
10495	287.65	12.1658	6.12165	0	0	1.84705
10521	203.568	8.48199	6.18234	0	0	1.82427
10547	239.237	10.3183	6.09081	0	0	1.80513
10573	24.0427	0.11894	6.07195	0	0	1.7908
10599	115.848	4.85122	6.02835	0	0	1.78236
10625	69.7654	3.00411	6.3073	0	0	1.7806
10651	72.9878	1.98845	6.13642	0	0	1.7859
10677	91.3074	1.40473	5.86611	0	0	1.79826
10703	216.497	8.97846	5.94308	0	0	1.81725
10729	156.563	6.15255	5.37302	0	0	1.84236
10755	178.105	6.3609	4.73366	0	0	1.87361
10781	219.893	7.85331	4.61212	0	0	1.91137
10807	212.24	7.57999	4.64515	0	0	1.95635
10833	244.112	8.74252	5.20101	0	0	2.00981
10859	186.116	5.43342	5.62429	0	0	2.07327
10885	0	0	6.02695	0	0	2.14831
10911	5.93577	0.00815	6.32993	0	0	2.23663
10937	154.33	5.51178	6.84523	0	0	2.33969
10963	86.209	3.13272	6.68111	0	0	2.45849
10989	6.42186	0.01796	6.42098	0	0	2.59376
11015	204.266	6.17286	6.72687	0	0	2.74574
11041	297.993	10.9458	7.16483	0	0	2.91399
11067	296.095	10.6803	7.26094	0	0	3.09722
11093	361.016	12.8934	6.82328	0	0	3.29384
11119	298.331	10.6547	8.1737	0	0	3.50187
11145	212.919	7.74507	8.47464	0	0	3.71906
11171	304.838	11.1956	8.88094	0	0	3.94359
11197	261.87	5.86003	9.95462	0	0	4.17438
11223	94.3862	1.21008	10.8654	0	0	4.41161
11249	328.671	12.173	11.6056	0	0	4.65603
11275	440.95	16.1745	14.7499	0	0	4.90893
11301	326.077	9.40607	14.3932	0	0	5.17183
11327	103.606	0.42695	14.1097	0	0	5.44635
11353	869.321	31.0914	14.439	1	253.527	5.73368
11379	154.383	5.7179	14.8283	0	0	6.03431
11405	216.378	7.72779	14.6387	0	0	6.34748
11431	701.544	25.9117	14.211	1	124.782	6.67129
11457	551.837	20.4384	15.9878	0	0	7.00277
11483	380.199	14.0815	17.0876	0	0	7.33836
11509	1806.22	65.9146	17.2771	1	1085.14	7.67436
11535	496.639	4.1676	18.6695	0	0	8.00677
11561	221.786	5.29464	18.6535	0	0	8.3315
11587	555.32	19.1489	19.2507	0	0	8.64475
11613	519.276	18.0511	19.2751	0	0	8.94351
11639	180.595	4.1432	18.9968	0	0	9.22588
11665	330.738	3.07051	18.9206	0	0	9.49144
11691	1136	39.6187	19.4927	1	343.839	9.74073
11717	596.882	22.1068	19.5872	0	0	9.97451
11743	425.854	15.7724	18.9469	0	0	10.1939
11769	1151	42.6296	16.4331	1	501.673	10.3998
11795	245.771	9.10263	18.0311	0	0	10.5927
11821	317.913	11.7745	18.1672	0	0	10.7722
11847	882.285	31.5551	19.6281	1	130.664	10.937
11873	104.407	0.43025	20.8994	0	0	11.085
11899	217.687	6.27942	20.8746	0	0	11.2137
11925	1029.89	36.7819	22.7476	1	185.455	11.3205
11951	615.23	22.2337	20.8295	0	0	11.4029
11977	114.182	1.91634	23.082	0	0	11.4595
12003	876.432	18.151	22.5668	0	0	11.4903
12029	897.761	34.5293	22.5292	1	132.567	11.4963
12055	200.615	7.88215	22.1244	0	0	11.4791
12081	1172.66	46.9063	23.6932	0	0	11.4419
12107	899.071	42.2049	23.5405	1	758.018	11.3884
12133	262.946	3.67136	25.1825	0	0	11.3228
12159	1193.59	38.6587	25.9873	1	150.021	11.2483
12185	92.2543	3.17474	25.6691	0	0	11.1678
12211	1282.52	64.9047	27.2853	1	798.667	11.0834
12237	197.005	5.98193	27.7635	0	0	10.9962
12263	1150.34	41.9152	28.2531	1	175.778	10.9063
12289	104.164	1.41275	29.5859	0	0	10.8121
12315	811.908	41.5815	32.335	1	60.9724	10.7112
12341	565.045	28.6526	32.4488	0	0	10.6008
12367	602.095	31.6283	33.7885	0	0	10.4788
12393	819.698	21.571	34.8631	0	0	10.3443
12419	759.184	30.7362	34.8808	0	0	10.1972
12445	1005.91	52.9424	37.3895	1	224.939	10.0385
12471	494.111	11.0025	34.7035	0	0	9.8696
12497	648.88	27.4526	35.5309	0	0	9.69212
12523	1177.95	59.8515	34.442	0	0	9.50836
12549	1176.13	60.1162	35.8356	0	0	9.3209
12575	979.385	49.0684	35.3779	0	0	9.13222
12601	1305.62	67.6595	35.006	1	1984.43	8.94428
12627	1043.85	24.0889	34.1438	0	0	8.758
12653	1013.87	38.9948	33.4226	0	0	8.57328
12679	1010.82	50.8403	33.8941	1	261.166	8.38934
12705	540.946	13.8704	31.3172	0	0	8.20486
12731	593.935	21.7015	31.6811	0	0	8.01788
12757	408.801	21.2262	30.9325	0	0	7.82652
12783	544.598	27.8914	28.9632	0	0	7.62975
12809	648.529	32.8859	26.815	0	0	7.42734
12835	413.383	21.5864	25.0336	0	0	7.22003
12861	552.097	15.2453	21.9425	0	0	7.00968
12887	215.344	7.86832	20.9901	0	0	6.79865
12913	789.997	39.6946	20.0646	1	330.945	6.58944
12939	134.584	3.98176	17.5368	0	0	6.38427
12965	491.703	17.9163	17.1235	0	0	6.18447
12991	261.406	13.229	16.3046	0	0	5.99072
13017	426.26	22.4348	15.5325	1	0.02217	5.80317
13043	366.719	19.301	14.2985	0	0	5.62148
13069	300.777	15.2215	13.4675	0	0	5.44441
13095	339.335	8.92986	12.6408	0	0	5.2704
13121	155.8	5.99231	11.9427	0	0	5.09805
13147	412.342	21.41	12.0761	1	63.246	4.92605
13173	112.492	2.81231	10.2532	0	0	4.75312
13199	164.699	6.01784	10.2856	0	0	4.57793
13225	122.863	6.14314	9.58051	0	0	4.39981
13251	131.121	6.55603	9.33846	0	0	4.21887
13277	88.9134	4.44567	8.50528	0	0	4.03604
13303	340.917	17.0963	7.75523	1	63.4318	3.85259
13329	186.303	5.87938	7.00771	0	0	3.6697
13355	64.4103	1.98185	6.65148	0	0	3.48789
13381	199.18	10.4025	6.70654	0	0	3.30717
13407	156.195	5.05894	5.61277	0	0	3.12737
13433	126.571	4.59768	5.92695	0	0	2.94847
13459	82.519	4.51943	5.77049	0	0	2.77091
13485	163.971	8.63007	5.59991	0	0	2.59513
13511	125.484	6.60441	5.40404	0	0	2.42132
13537	95.951	5.05005	5.26747	0	0	2.24938
13563	50.3205	1.01863	4.38139	0	0	2.0792
13589	48.5346	2.16146	4.07831	0	0	1.91092
13615	135.062	7.03844	4.07286	0	0	1.74516
13641	35.4073	0.62853	3.52956	0	0	1.58269
13667	190.27	8.78167	3.61373	0	0	1.42451
13693	59.6926	3.04505	3.51121	0	0	1.27216
13719	57.0059	2.90223	3.66781	0	0	1.12718
13745	54.5903	2.8345	3.38427	0	0	0.99088
13771	36.0261	1.85079	3.28529	0	0	0.8642
13797	15.8206	0.26078	3.03446	0	0	0.74778
13823	9.94429	0.12078	3.46375	0	0	0.64234
13849	36.1536	1.87842	3.78345	0	0	0.54863
13875	6.74197	0.07979	3.43828	0	0	0.4672
13901	121.819	6.6581	3.70993	0	0	0.39849
13927	51.8421	2.64982	3.45298	0	0	0.34295
13953	149.596	7.49494	3.60211	0	0	0.30059
13979	61.6119	3.24273	3.49446	0	0	0.27097
14005	91.1	4.72381	3.66292	0	0	0.25361
14031	20.1071	0.28422	3.81072	0	0	0.24869
14057	168.566	9.1752	4.17643	0	0	0.25638
14083	156.478	8.23569	4.39114	0	0	0.27648
14109	33.8867	0.48018	4.41643	0	0	0.30858
14135	107.26	5.79003	4.44337	0	0	0.35267
14161	73.1531	3.89952	4.1701	0	0	0.40908
14187	111.693	5.8786	4.23975	0	0	0.47784
14213	38.4832	0.85691	3.87595	0	0	0.55852
14239	135.519	6.03524	4.03507	0	0	0.65073
14265	90.2553	4.65893	4.03722	0	0	0.75411
14291	139.661	7.2092	4.33614	0	0	0.86835
14317	80.4264	4.2004	4.06923	0	0	0.99332
14343	47.1772	2.35886	4.06363	0	0	1.1291
14369	30.762	0.59158	4.59997	0	0	1.2756
14395	34.6534	1.4661	4.60872	0	0	1.43235
14421	78.8405	3.97313	4.86173	0	0	1.59865
14447	26.8542	0.58264	4.58568	0	0	1.77394
14473	147.404	6.26616	5.05474	0	0	1.95774
14499	90.5276	4.76461	4.90391	0	0	2.14939
14525	116.907	5.96368	5.5155	0	0	2.34788
14551	78.5776	4.10385	5.18562	0	0	2.55189
14577	157.485	8.12931	5.83363	0	0	2.75994
14603	206.716	10.6706	5.8054	0	0	2.97064
14629	113.173	5.95646	5.9193	0	0	3.18314
14655	165.427	8.70669	6.35327	0	0	3.397
14681	39.1277	0.63365	6.42362	0	0	3.61194
14707	241.296	9.76907	6.39296	0	0	3.82787
14733	120.44	3.16947	6.9223	0	0	4.04499
14759	321.676	16.2792	7.13043	1	58.4304	4.26326
14785	55.0677	0.94133	7.0351	0	0	4.48189
14811	347.238	16.5126	7.17697	0	0	4.69938
14837	139.202	1.82261	7.79742	0	0	4.91434
14863	78.4701	2.75564	7.76827	0	0	5.12561
14889	217.976	9.71156	7.75217	0	0	5.33232
14915	175.706	5.30981	7.67215	0	0	5.53382
14941	0	0	8.67453	0	0	5.72955
14967	583.571	16.3237	8.16649	1	32.6504	5.91875
14993	293.373	8.71914	8.03154	0	0	6.10028
15019	139.716	4.15239	7.67557	0	0	6.2726
15045	224.378	6.79934	8.8641	0	0	6.43421
15071	657.292	19.918	8.12763	1	127.112	6.58377
15097	341.975	10.1167	8.03661	0	0	6.72009
15123	189.247	5.65041	8.30376	0	0	6.84252
15149	237.973	7.18645	8.86894	0	0	6.95104
15175	659.238	19.6787	8.72859	1	105.268	7.04598
15201	50.7106	0.11644	8.85039	0	0	7.12777
15227	31.4741	0.60527	8.68034	0	0	7.19713
15253	320.179	9.5158	8.65482	0	0	7.25499
15279	776.274	23.5235	8.54071	1	210.116	7.30224
15305	83.1464	2.51959	8.35574	0	0	7.33939
15331	15.9897	0.09318	8.82917	0	0	7.36639
15357	479.955	7.83144	8.44078	0	0	7.38288
15383	674.851	20.45	8.2328	1	138.212	7.38824
15409	87.2222	2.6431	8.48271	0	0	7.38141
15435	74.0566	2.31427	8.74839	0	0	7.36112
15461	418.965	13.0927	9.08627	0	0	7.3265
15487	267.869	8.23433	9.07649	0	0	7.27789
15513	65.4819	1.9843	8.87022	0	0	7.21681
15539	108.405	3.28499	8.69624	0	0	7.14558
15565	954.129	28.913	9.2345	1	332.205	7.06683
15591	293.578	2.73733	9.82047	0	0	6.983
15617	117.78	1.69875	10.2981	0	0	6.89654
15643	384.603	11.9348	9.47219	0	0	6.80986
15669	815.98	24.7266	9.37656	1	219.666	6.7249
15695	209.405	6.53626	10.0712	0	0	6.64273
15721	49.8458	0.41938	10.6249	0	0	6.56363
15747	369.382	5.5967	10.2577	0	0	6.48748
15773	662.409	20.2178	10.1533	1	82.241	6.4141
15799	407.892	12.7466	10.0956	0	0	6.34247
15825	370.479	11.2266	9.76438	0	0	6.2709
15851	551.714	16.9066	10.5117	0	0	6.19746
15877	309.242	4.75758	10.4698	0	0	6.12033
15903	114.553	0.8261	10.0721	0	0	6.03808
15929	496.397	15.5124	9.90799	0	0	5.95002
15955	755.615	23.613	9.89824	0	0	5.85646
15981	174.373	1.2575	10.1909	0	0	5.75871
16007	0	0	10.8989	0	0	5.65848
16033	227.653	2.18897	11.0034	0	0	5.55752
16059	727.906	22.6203	10.7397	1	129.459	5.45749
16085	584.304	16.9364	10.698	0	0	5.35964
16111	134.839	0.90194	10.8378	0	0	5.2642
16137	341.556	4.37892	10.8379	0	0	5.17059
16163	716.333	21.6089	10.8889	1	99.2824	5.07762
16189	215.939	6.35113	11.3756	0	0	4.98356
16215	198.254	5.98051	11.4112	0	0	4.88608
16241	628.586	19.0481	12.5926	0	0	4.78272
16267	732.73	22.2039	12.9016	0	0	4.67157
16293	255.262	7.73523	12.879	0	0	4.55174
16319	344.363	10.4352	13.4281	0	0	4.42326
16345	638.026	19.5629	13.7992	0	0	4.28706
16371	335.135	4.75931	14.9503	0	0	4.14503
16397	219.98	1.79471	16.0468	0	0	4.00015
16423	817.067	24.7596	16.5302	1	34.5271	3.85601
16449	801.561	24.2897	18.2646	0	0	3.71576
16475	773.524	23.7036	19.4622	0	0	3.58166
16501	381.597	5.87073	19.8299	0	0	3.45511
16527	244.087	1.76024	19.167	0	0	3.33675
16553	1057.71	33.0535	18.7599	1	192.197	3.22665
16579	791.542	23.9861	18.2107	0	0	3.12464
16605	768.014	22.773	17.9847	0	0	3.02991
16631	846.41	25.2136	18.5686	0	0	2.94117
16657	1016.19	30.7937	18.7404	0	0	2.85705
16683	1297.01	39.3034	17.4373	0	0	2.77671
16709	922.735	28.7346	17.1781	0	0	2.7001
16735	855.507	26.0354	16.0349	0	0	2.6278
16761	520.469	9.60865	15.7259	0	0	2.56094
16787	0	0	15.653	0	0	2.50127
16813	0	0	14.7464	0	0	2.45056
16839	623.863	15.2694	14.3476	0	0	2.41026
16865	527.396	15.8533	13.8076	0	0	2.38148
16891	231.94	5.05955	12.9849	0	0	2.3648
16917	0	0	11.7515	0	0	2.36027
16943	664.592	19.3646	9.68295	0	0	2.36779
16969	212.669	1.98293	8.83707	0	0	2.38702
16995	0	0	8.54109	0	0	2.41721
17021	82.7946	0.37464	9.11626	0	0	2.45722
17047	538.165	15.8284	9.97885	0	0	2.50569
17073	529.873	16.4087	9.97885	0	0	2.56129
17099	408.017	12.5128	11.7744	0	0	2.62248
17125	316.264	9.58375	13.691	0	0	2.68773
17151	263.104	7.35956	14.7637	0	0	2.75584
17177	0	0	15.4976	0	0	2.82632
17203	501.691	12.6629	17.6765	0	0	2.89878
17229	664.801	20.4119	20.9818	0	0	2.97288
17255	677.717	20.5369	24.1634	0	0	3.04825
17281	585.91	16.3891	26.6461	0	0	3.1247
17307	0	0	26.3811	0	0	3.20255
17333	1990.22	49.3851	25.5385	0	0	3.28225
17359	1679.04	52.2687	25.6941	1	988.696	3.36392
17385	847.178	25.4397	28.3455	0	0	3.44708
17411	474.109	13.9444	31.7707	0	0	3.53132
17437	2066	60.7648	33.044	0	0	3.6165
17463	2157.39	64.7837	32.4453	0	0	3.70252
17489	2019.95	60.4489	31.9659	0	0	3.78953
17515	1613.82	47.547	32.994	1	2189.2	3.87767
17541	361.592	10.7938	34.4307	0	0	3.96689
17567	69.5369	0.39918	36.6838	0	0	4.05746
17593	919.321	15.4693	36.5714	0	0	4.14922
17619	1936.79	59.9604	36.3357	0	0	4.24161
17645	2389.01	72.4372	37.2519	1	1215.19	4.33373
17671	786.246	24.1922	37.9672	0	0	4.4244
17697	181.441	1.28834	36.7104	0	0	4.51256
17723	713.741	11.3036	33.9169	0	0	4.59703
17749	1362.4	40.0706	30.7792	0	0	4.67691
17775	1485.34	43.6866	30.1268	0	0	4.75182
17801	1455.49	42.8086	30.7076	0	0	4.82199
17827	1577.05	47.2488	30.8685	0	0	4.88812
17853	1593.33	47.7913	30.0543	0	0	4.95129
17879	1456.82	42.8477	26.905	1	1351.72	5.01252
17905	936.157	27.534	24.2009	0	0	5.07257
17931	1240.61	36.8864	23.7014	0	0	5.13194
17957	728.416	11.7082	24.1627	0	0	5.19031
17983	183.863	0.83196	24.3447	0	0	5.24673
18009	1195.11	35.1504	23.8225	0	0	5.28255
18035	717.444	21.8301	22.4108	0	0	5.31609
18061	266.79	3.45529	22.1337	0	0	5.34833
18087	0	0	19.7179	0	0	5.37954
18113	53.4559	0.12461	19.1888	0	0	5.40969
18139	694.927	21.0584	17.5466	0	0	5.43873
18165	473.23	14.7023	16.7845	0	0	5.46662
18191	327.418	10.0529	17.3287	0	0	5.49336
18217	422.15	14.7605	17.3564	0	0	5.519
18243	663.313	30.1506	17.3127	1	154.35	5.54365
18269	371.001	16.8637	15.9977	0	0	5.56742
18295	811.449	37.5439	17.9003	0	0	5.59045
18321	148.703	1.34908	19.0248	0	0	5.61285
18347	780.494	37.7382	20.2333	1	275.69	5.6347
18373	504.605	11.6447	19.7395	0	0	5.65607
18399	339.417	13.0545	17.6068	0	0	5.67698
18425	944.52	47.226	16.8321	1	610.805	5.69739
18451	454.457	12.2354	19.8205	0	0	5.71732
18477	201.135	0	0	0	0	5.7368
