# Supplementary material for: Postglacial fire history and interactions with vegetation and climate in southwestern Yunnan Province of China
Source: Copernicus journal article supplement (doi:10.5194/cp-13-613-2017), 2017-06-07
Supplement: Supplementary file 1 [file the Supplement.pdf › the Supplement/the Supplement.pdf]

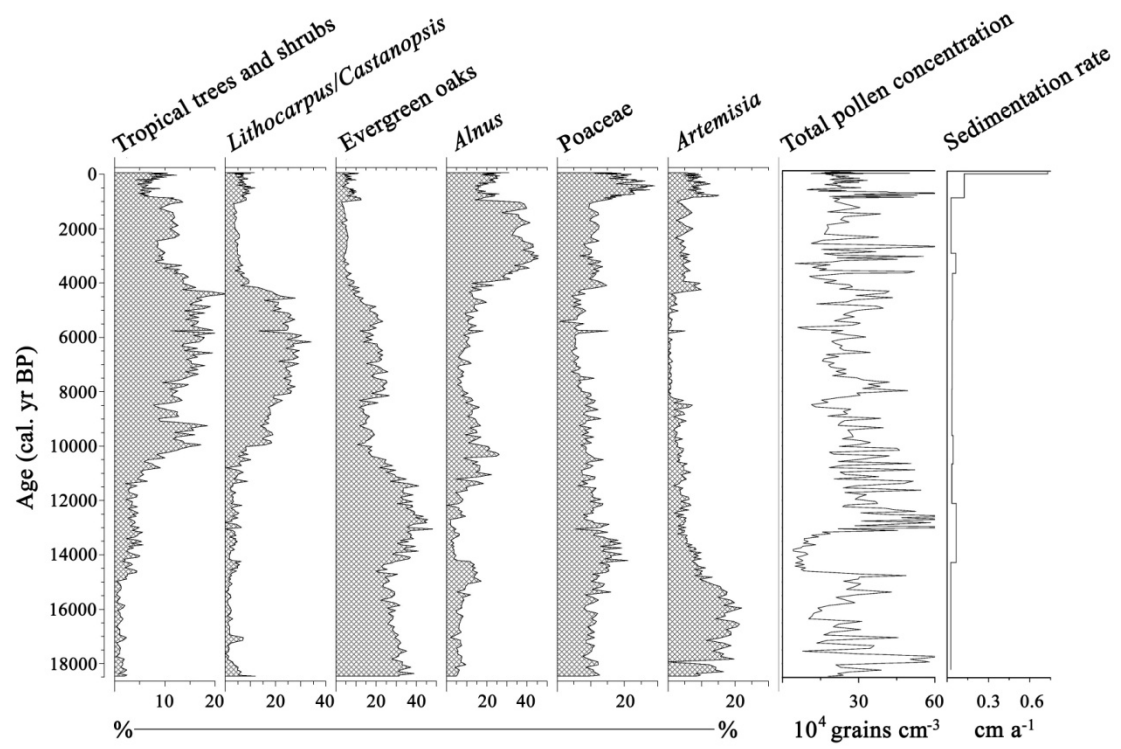

Fig. S1. A comparison of pollen percentages for 6 main pollen taxa and total pollen concentration.

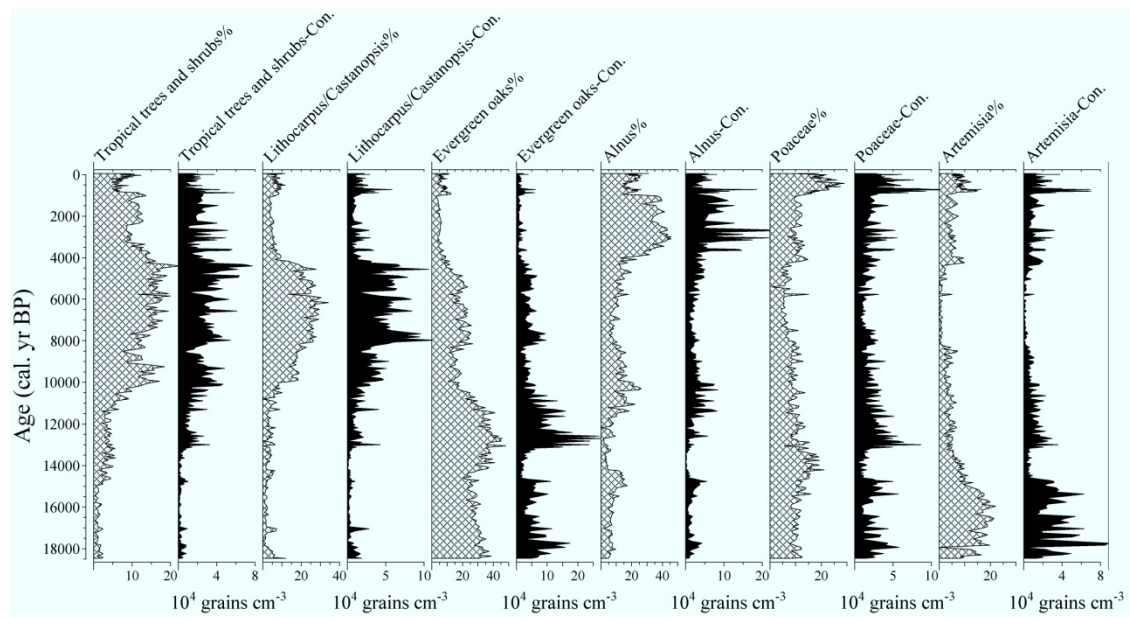

Fig. S2. A comparison of pollen percentages and concentrations for 6 main pollen taxa.

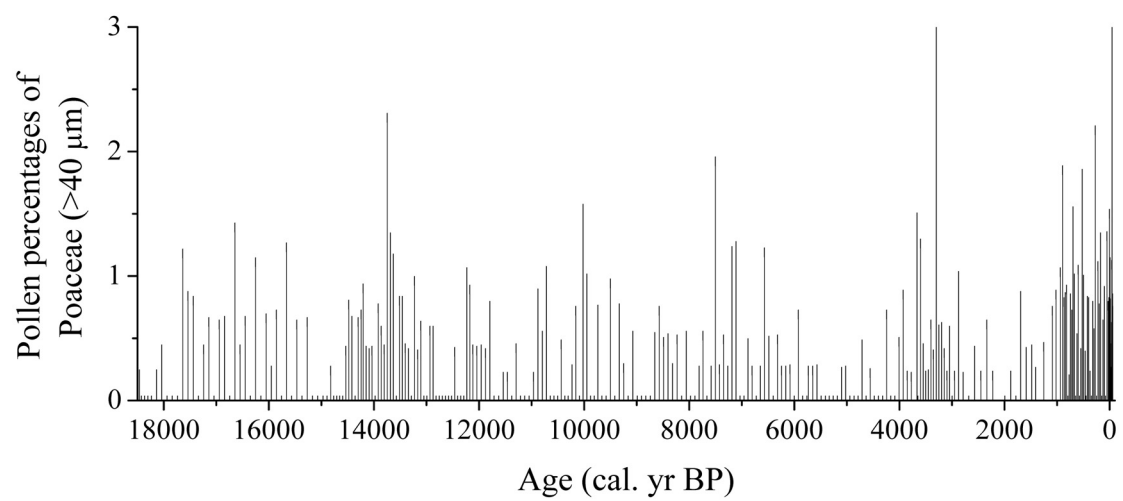

Fig. S3. Pollen percentages of Poaceae (>40 μm) since 18.5 ka in Qinghai Lake.
