# Supplementary material for: Postglacial fire history and interactions with vegetation and climate in southwestern Yunnan Province of China
Source: Copernicus journal article supplement (doi:10.5194/cp-13-613-2017), 2017-06-07
Supplement: Supplementary file [file cp-13-613-2017-supplement-title-page.pdf › cp-13-613-2017-supplement-title-page.pdf]

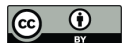

## *Supplement of*

# **Postglacial fire history and interactions with vegetation and climate in southwestern Yunnan Province of China**

**Xiayun Xiao et al.**

*Correspondence to:* Xiayun Xiao (xyxiao@niglas.ac.cn) and Ji Shen (jishen@niglas.ac.cn)

- cp-13-613-2017-supplement-title-page.pdf
- the Supplement
  - Data availability.xlsx
  - the Supplement.pdf

The copyright of individual parts of the supplement might differ from the CC BY 3.0 License.
